# Supplementary material
Source: PubMed Central journal article supplement (PMC2804229)

## SUPPLEMENTAL FIGURE LEGENDS

**Figure S1:** Alignment of cluster 1 and cluster 2 raptor phosphorylation sites from various organisms using the algorithm Clustal V. Identical residues are highlighted in grey.

**Figure S2: Wild type (WT) and S863A Myc-raptor interact with mTORC1 partner proteins similarly.** HEK293 cells were co-transfected with WT or S863A Myc-raptor [0.5  $\mu$ g], HA-GBL [0.5  $\mu$ g], and AU1-mTOR [4  $\mu$ g], serum-deprived, stimulated with insulin, and lysed in Buffer B/Chaps. Myc-raptor was immunoprecipitated from WCL and immunoblotted with the indicated antibodies. WCL was also immunoblotted directly to confirm expression of the transfected proteins as well as the expected activation of mTORC1 signaling. Note: Insulin-induced destabilization of the mTOR-raptor co-immunoprecipitation is more prominent when cells are lysed in Buffer B/Chaps relative to Buffer A/Chaps.

**Cluster 1: S696/T706**

|     |                                                                                 |                 |
|-----|---------------------------------------------------------------------------------|-----------------|
|     | Y P L P S P A X T E G G S L T P V R D S P C T P R L R S V S S Y G N I R A V X T | Majority        |
|     | *            1130            *            1140            1150            1160  |                 |
| 692 | Y A L P S P A T T E G G S L T P V R D S P C T P R L R S V S S Y G N I R A V A T | H. sapiens      |
| 692 | Y P L P S P A A T E G G S L T P V R D S P C T P R L R S V S S Y G N I R A V T T | R. norvegicus   |
| 692 | Y P L P S P A A T E G G S L T P V R D S P C T P R L R S V S S Y G N I R A V T T | M. musculus     |
| 866 | - - M R G H V S A A S F V M C P D P R D L - T S S T H S L E R H V T I R R G A S | D. melanogaster |
| 924 | K L P R K R N S S E N L S E Q G L D I A A E M P S N H R R P R A P P V N E F M Q | C. elegans      |
| 852 | Q Q Q Q H L E Q Q Q M K I E K Q I R H - - C Q V M Q N Q L E V I - D L R K L K R | S. cerevisiae   |

S696
T706

**Cluster 2: S855/S859/S863/S877**

|      |                                                                                 |                 |
|------|---------------------------------------------------------------------------------|-----------------|
|      | - - - - - A Y K A T V N A R - - - - - P Q R X L D T S - - - - S L T             | Majority        |
|      | 1290            1300            1310            * 1320                          |                 |
| 838  | - - - - - A Y K A T V N A R - - - - - P Q R V L D T S - - - - S L T             | H. sapiens      |
| 838  | - - - - - A Y K A T V N A R - - - - - P Q R I L D T S - - - - S L T             | R. norvegicus   |
| 838  | - - - - - A Y K A T V N A R - - - - - P Q R I L D T S - - - - S L T             | M. musculus     |
| 986  | - - - - R D T A L C P I M A A K - - - - - E A T M A N A S E K C S S L S         | D. melanogaster |
| 1071 | N I D N T M A H L S R K M I A R K N S K A T V E M P R K P V G P S E E V S T L S | C. elegans      |
| 994  | - - - - L L E L S A H K E L G G - - - - - P F A V M E K F L - - - - L K         | S. cerevisiae   |

S855

|      |                                                                                 |                 |
|------|---------------------------------------------------------------------------------|-----------------|
|      | Q S A P A S - P T N K G M H I H Q V G G - - - - - S P P A S S T S S X S         | Majority        |
|      | *            *            1330            1340            1350            1360  |                 |
| 858  | Q S A P A S - P T N K G V H I H Q A G G - - - - - S P P A S S T S S S S         | H. sapiens      |
| 858  | Q S A P A S - P T N K G M H I H Q V G G - - - - - S P P A S S T S S C S         | R. norvegicus   |
| 858  | Q S A P A S - P T N K G M H M H Q V G G - - - - - S P P A S S T S S C S         | M. musculus     |
| 1013 | V S L P P S - P N T R V N Y L G G G G A P G G A G A T A E S P P V G A A A S G A | D. melanogaster |
| 1111 | E R I K R N L E V E K E S G V S A D G I D F T K L N M Q K A K E Q R K G G K G G | C. elegans      |
| 1017 | R S S K A H - Q T G K - F G F N S S Q V Q F V K S S L R S F S P N E R V D N N A | S. cerevisiae   |

S859
S863
S877

# Foster\_Figure S2

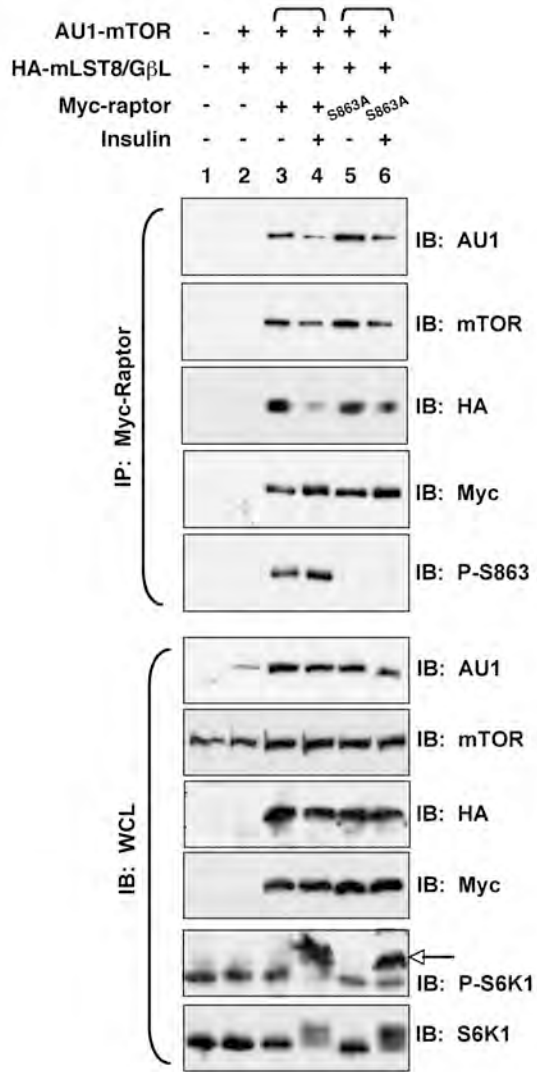

Supplement: supp_M109.029637_jbc.M109.029637-1.pdf [file supp_M109.029637_jbc.M109.029637-1.pdf]
